# Supplementary material for: Sodium alterations impair the prognosis of hospitalized patients with COVID-19 pneumonia
Source: PubMed Central journal article supplement — Endocr Connect. 2021 Sep 17;10(10):1344–51. doi: 10.1530/EC-21-0411 (PMC8558885; doi:10.1530/ec-21-0411), 2021-09-17
Supplement: supplementary_table_1.pdf [file supplementary_table_1.pdf]

**Supplemental Table I****Serum sodium levels according to gender, intensity of care and hospitalization outcome**

|                               | Serum sodium (mmol/L)         |                                |                                |                                     |
|-------------------------------|-------------------------------|--------------------------------|--------------------------------|-------------------------------------|
|                               | Na <sup>+</sup> <sub>in</sub> | Na <sup>+</sup> <sub>min</sub> | Na <sup>+</sup> <sub>max</sub> | ΔNa <sup>+</sup> <sub>min-max</sub> |
| <b>Gender</b>                 |                               |                                |                                |                                     |
| - Male (n=81)                 | 138±6                         | 135±6                          | 146±5                          | 11±7                                |
| - Female (n=36)               | 138±5                         | 136±4                          | 145±4                          | 9±5                                 |
| <b>Admission care setting</b> |                               |                                | **                             | *                                   |
| - Semi-intensive (n=99)       | 138±6                         | 135±5                          | 145±5                          | 10±6                                |
| - ICU (n=18)                  | 137±7                         | 135±5                          | 150±6                          | 15±9                                |
| <b>Need for ICU</b>           |                               |                                | **                             | **                                  |
| - No (n=85)                   | 138±6                         | 135±6                          | 144±5                          | 9±6                                 |
| - Yes (n=32)                  | 137±6                         | 135±5                          | 149±5                          | 14±7                                |
| <b>Maximum ventilation</b>    |                               |                                | **                             | *                                   |
| - Ambient air (n=7)           | 137±6                         | 134±5                          | 144±3                          | 10±6                                |
| - Non-invasive (n=64)         | 138±6                         | 135±6                          | 145±5                          | 9±6                                 |
| - Invasive (n=32)             | 137±6                         | 135±5                          | 149±5                          | 14±7                                |
| <b>Patient's outcome</b>      |                               |                                |                                |                                     |
| - Discharged (n=97)           | 138±6                         | 135±5                          | 146±5                          | 11±7                                |
| - Dead (n=20)                 | 138±6                         | 136±5                          | 145±7                          | 9±7                                 |

Data are expressed as mean ± SD \*p<0.050, \*\*p≤0.001. Data concerning maximum requested ventilation were available for 103/117 patients. Abbreviations: ICU = Intensive Care Unit.
