# Supplementary material for: Sodium alterations impair the prognosis of hospitalized patients with COVID-19 pneumonia
Source: PubMed Central journal article supplement — Endocr Connect. 2021 Sep 17;10(10):1344–51. doi: 10.1530/EC-21-0411 (PMC8558885; doi:10.1530/ec-21-0411), 2021-09-17
Supplement: supplementary_table_2.pdf [file supplementary_table_2.pdf]

**Supplemental Table II****Distribution of sodium patterns at different time points according to gender, intensity of care and hospitalization outcome**

|                               | Natremia, admission |         |        | Natremia, trend during hospitalization |         |         |                   |
|-------------------------------|---------------------|---------|--------|----------------------------------------|---------|---------|-------------------|
|                               | Hypo-               | Normo-  | Hyper- | Hypo-                                  | Normo-  | Hyper-  | Mixed dysnatremia |
| <b>Gender</b>                 |                     |         |        |                                        |         |         |                   |
| - Male (n=81)                 | 23 (28)             | 51 (63) | 7 (9)  | 20 (25)                                | 25 (31) | 23 (28) | 13 (16)           |
| - Female (n=36)               | 8 (22)              | 27 (75) | 1 (3)  | 9 (25)                                 | 14 (39) | 10 (27) | 3 (8)             |
| <b>Admission care setting</b> |                     |         |        |                                        |         |         |                   |
| - Semi-intensive (n=99)       | 24 (24)             | 68 (69) | 7 (7)  | 30 (30)                                | 35 (35) | 26 (27) | 8 (8)             |
| - ICU (n=18)                  | 7 (39)              | 10 (56) | 1 (5)  | 0                                      | 4 (22)  | 6 (33)  | 8 (45)            |
| <b>Need for ICU</b>           |                     |         |        |                                        |         |         |                   |
| - No (n=85)                   | 21 (25)             | 57 (67) | 7 (8)  | 26 (31)                                | 34 (40) | 20 (24) | 5 (6)             |
| - Yes (n=32)                  | 10 (31)             | 21 (66) | 1 (3)  | 3 (9)                                  | 5 (16)  | 13 (40) | 11 (35)           |
| <b>Maximum ventilation</b>    |                     |         |        |                                        |         |         |                   |
| - Ambient air (n=7)           | 3 (43)              | 3 (43)  | 1 (14) | 3 (43)                                 | 2 (29)  | 1 (14)  | 1 (14)            |
| - Non-invasive (n=64)         | 15 (23)             | 44 (69) | 5 (8)  | 20 (31)                                | 25 (39) | 15 (23) | 4 (6)             |
| - Invasive (n=32)             | 10 (31)             | 21 (66) | 1 (3)  | 3 (9)                                  | 5 (16)  | 13 (40) | 11 (35)           |
| <b>Patient's outcome</b>      |                     |         |        |                                        |         |         |                   |
| - Discharged (n=97)           | 27 (28)             | 63 (65) | 7 (7)  | 25 (26)                                | 32 (33) | 26 (27) | 14 (14)           |
| - Dead (n=20)                 | 4 (20)              | 15 (75) | 1 (5)  | 4 (20)                                 | 7 (35)  | 7 (35)  | 2 (10)            |

Data are expressed as number and percentage; \* $p \leq 0.001$ . Data concerning maximum requested ventilation were available for 103/117 patients. Abbreviations: ICU = Intensive Care Unit.
